# Supplementary material for: DFT study of alkali and alkaline earth metal-doped benzocryptand with remarkable NLO properties
Source: Royal Society of Chemistry journal article supplement (doi:10.1039/d2ra02209e), 2022-01-01
Supplement: d2ra02209e1.pdf [file d2ra02209e1.pdf]

### Information about surface BC

| Center<br>Number | Atomic<br>Number | Atomic<br>Type | Coordinates (Angstroms) |           |           |
|------------------|------------------|----------------|-------------------------|-----------|-----------|
|                  |                  |                | X                       | Y         | Z         |
| 1                | 8                | 0              | 0.159230                | -0.876500 | 1.600848  |
| 2                | 8                | 0              | 0.188998                | 1.860532  | 1.496069  |
| 3                | 8                | 0              | 3.851811                | -1.484886 | -0.258307 |
| 4                | 8                | 0              | 2.592510                | 1.153811  | -0.443504 |
| 5                | 8                | 0              | -1.555275               | -1.389811 | -1.199236 |
| 6                | 8                | 0              | -1.713298               | 1.143154  | -0.829250 |
| 7                | 7                | 0              | 1.016062                | -2.691237 | -0.566670 |
| 8                | 7                | 0              | 0.481313                | 2.851157  | -1.011303 |
| 9                | 6                | 0              | 0.611298                | -3.116051 | 0.770379  |
| 10               | 6                | 0              | 2.312534                | -3.263428 | -0.947943 |
| 11               | 6                | 0              | 0.524147                | 3.775281  | 0.136273  |
| 12               | 6                | 0              | 1.690135                | 2.864532  | -1.826617 |
| 13               | 6                | 0              | 0.081685                | -3.067548 | -1.632170 |
| 14               | 6                | 0              | -0.725537               | 3.047374  | -1.818030 |
| 15               | 6                | 0              | -0.345630               | -2.198205 | 1.529331  |
| 16               | 6                | 0              | 0.884295                | 3.092137  | 1.451463  |
| 17               | 6                | 0              | 3.542808                | -2.852650 | -0.149498 |
| 18               | 6                | 0              | 2.897907                | 2.398601  | -1.041077 |
| 19               | 6                | 0              | -1.380831               | -2.776943 | -1.386930 |
| 20               | 6                | 0              | -1.946575               | 2.530878  | -1.091911 |
| 21               | 6                | 0              | -0.508411               | -0.097850 | 2.593154  |
| 22               | 6                | 0              | 0.226403                | 1.205163  | 2.751513  |
| 23               | 6                | 0              | 3.388875                | -0.704031 | 0.822697  |
| 24               | 6                | 0              | 3.589679                | 0.745168  | 0.476625  |

|    |   |   |           |           |           |
|----|---|---|-----------|-----------|-----------|
| 25 | 6 | 0 | -2.722739 | -0.962538 | -0.637639 |
| 26 | 6 | 0 | -2.790548 | 0.420177  | -0.398973 |
| 27 | 6 | 0 | -3.791113 | -1.776189 | -0.276023 |
| 28 | 6 | 0 | -3.894652 | 0.967810  | 0.238093  |
| 29 | 6 | 0 | -4.907619 | -1.218594 | 0.356231  |
| 30 | 6 | 0 | -4.953758 | 0.140825  | 0.621510  |
| 31 | 1 | 0 | 1.512869  | -3.188504 | 1.382266  |
| 32 | 1 | 0 | 0.166682  | -4.130315 | 0.765635  |
| 33 | 1 | 0 | 2.499362  | -2.973393 | -1.986728 |
| 34 | 1 | 0 | 2.268510  | -4.372542 | -0.929792 |
| 35 | 1 | 0 | -0.465942 | 4.224350  | 0.271782  |
| 36 | 1 | 0 | 1.219526  | 4.607755  | -0.046721 |
| 37 | 1 | 0 | 1.907110  | 3.864852  | -2.242190 |
| 38 | 1 | 0 | 1.537543  | 2.182123  | -2.669409 |
| 39 | 1 | 0 | 0.139457  | -4.157151 | -1.830439 |
| 40 | 1 | 0 | 0.397173  | -2.556655 | -2.547732 |
| 41 | 1 | 0 | -0.608725 | 2.489293  | -2.752685 |
| 42 | 1 | 0 | -0.888765 | 4.106292  | -2.075440 |
| 43 | 1 | 0 | -1.356686 | -2.177081 | 1.113691  |
| 44 | 1 | 0 | -0.428389 | -2.608595 | 2.547183  |
| 45 | 1 | 0 | 1.962225  | 2.903116  | 1.554426  |
| 46 | 1 | 0 | 0.563907  | 3.730732  | 2.286192  |
| 47 | 1 | 0 | 3.472523  | -3.147621 | 0.907201  |
| 48 | 1 | 0 | 4.388307  | -3.407154 | -0.572015 |
| 49 | 1 | 0 | 3.761322  | 2.294253  | -1.713062 |
| 50 | 1 | 0 | 3.167660  | 3.130693  | -0.265690 |
| 51 | 1 | 0 | -1.962064 | -3.117011 | -2.254822 |
| 52 | 1 | 0 | -1.739250 | -3.336890 | -0.515666 |

|    |   |   |           |           |           |
|----|---|---|-----------|-----------|-----------|
| 53 | 1 | 0 | -2.127472 | 3.075340  | -0.153522 |
| 54 | 1 | 0 | -2.836084 | 2.638030  | -1.723501 |
| 55 | 1 | 0 | -0.511652 | -0.629398 | 3.554360  |
| 56 | 1 | 0 | -1.549040 | 0.088208  | 2.291687  |
| 57 | 1 | 0 | -0.279418 | 1.821100  | 3.511263  |
| 58 | 1 | 0 | 1.271773  | 1.027240  | 3.048961  |
| 59 | 1 | 0 | 3.965727  | -0.937347 | 1.732293  |
| 60 | 1 | 0 | 2.327652  | -0.885569 | 1.027142  |
| 61 | 1 | 0 | 3.525514  | 1.359581  | 1.387925  |
| 62 | 1 | 0 | 4.586524  | 0.880156  | 0.035451  |
| 63 | 1 | 0 | -3.778708 | -2.838329 | -0.489517 |
| 64 | 1 | 0 | -3.934669 | 2.032439  | 0.454405  |
| 65 | 1 | 0 | -5.734393 | -1.861639 | 0.638645  |
| 66 | 1 | 0 | -5.807644 | 0.576299  | 1.128521  |

-----

**Information about complex Li(BC)Be**

| Center<br>Number | Atomic<br>Number | Atomic<br>Type | Coordinates (Angstroms) |           |           |
|------------------|------------------|----------------|-------------------------|-----------|-----------|
|                  |                  |                | X                       | Y         | Z         |
| 1                | 8                | 0              | 0.277012                | -0.846991 | 1.604316  |
| 2                | 8                | 0              | -0.073401               | 1.860892  | 1.385698  |
| 3                | 8                | 0              | 4.065509                | -1.000956 | -0.152197 |
| 4                | 8                | 0              | 2.454964                | 1.425136  | -0.473268 |
| 5                | 8                | 0              | -1.275438               | -1.704123 | -1.206149 |
| 6                | 8                | 0              | -1.795565               | 0.793768  | -0.945798 |
| 7                | 7                | 0              | 1.435232                | -2.605357 | -0.467456 |
| 8                | 7                | 0              | 0.142727                | 2.785304  | -1.154469 |
| 9                | 6                | 0              | 1.059165                | -3.030996 | 0.877685  |

|    |   |   |           |           |           |
|----|---|---|-----------|-----------|-----------|
| 10 | 6 | 0 | 2.808441  | -3.003687 | -0.797976 |
| 11 | 6 | 0 | 0.026076  | 3.749843  | -0.045945 |
| 12 | 6 | 0 | 1.358618  | 2.937191  | -1.944854 |
| 13 | 6 | 0 | 0.590686  | -3.150242 | -1.535071 |
| 14 | 6 | 0 | -1.058292 | 2.778459  | -1.993100 |
| 15 | 6 | 0 | -0.036098 | -2.228356 | 1.577919  |
| 16 | 6 | 0 | 0.443828  | 3.175440  | 1.303744  |
| 17 | 6 | 0 | 3.948010  | -2.393366 | 0.007453  |
| 18 | 6 | 0 | 2.598804  | 2.676522  | -1.116078 |
| 19 | 6 | 0 | -0.903976 | -3.059100 | -1.332030 |
| 20 | 6 | 0 | -2.213622 | 2.123676  | -1.271006 |
| 21 | 6 | 0 | -0.518519 | -0.132343 | 2.549366  |
| 22 | 6 | 0 | 0.022561  | 1.266241  | 2.667973  |
| 23 | 6 | 0 | 3.469986  | -0.251896 | 0.885530  |
| 24 | 6 | 0 | 3.475175  | 1.196697  | 0.483265  |
| 25 | 6 | 0 | -2.505385 | -1.424047 | -0.686808 |
| 26 | 6 | 0 | -2.772004 | -0.056465 | -0.507655 |
| 27 | 6 | 0 | -3.458576 | -2.365385 | -0.313276 |
| 28 | 6 | 0 | -3.958024 | 0.354510  | 0.083325  |
| 29 | 6 | 0 | -4.658140 | -1.946484 | 0.272228  |
| 30 | 6 | 0 | -4.900745 | -0.597873 | 0.479381  |
| 31 | 1 | 0 | 1.945777  | -2.952189 | 1.510294  |
| 32 | 1 | 0 | 0.760972  | -4.097155 | 0.906348  |
| 33 | 1 | 0 | 2.979864  | -2.730545 | -1.843972 |
| 34 | 1 | 0 | 2.919433  | -4.106424 | -0.734319 |
| 35 | 1 | 0 | -1.020255 | 4.060003  | 0.050469  |
| 36 | 1 | 0 | 0.602782  | 4.664204  | -0.249429 |
| 37 | 1 | 0 | 1.444371  | 3.941304  | -2.397428 |

|    |   |   |           |           |           |
|----|---|---|-----------|-----------|-----------|
| 38 | 1 | 0 | 1.324905  | 2.208094  | -2.761276 |
| 39 | 1 | 0 | 0.805345  | -4.227703 | -1.686344 |
| 40 | 1 | 0 | 0.855381  | -2.635747 | -2.464602 |
| 41 | 1 | 0 | -0.840327 | 2.206727  | -2.901007 |
| 42 | 1 | 0 | -1.361186 | 3.793140  | -2.297875 |
| 43 | 1 | 0 | -1.029016 | -2.365777 | 1.141266  |
| 44 | 1 | 0 | -0.087141 | -2.606725 | 2.610161  |
| 45 | 1 | 0 | 1.534549  | 3.144107  | 1.436449  |
| 46 | 1 | 0 | 0.015702  | 3.794319  | 2.104319  |
| 47 | 1 | 0 | 3.892169  | -2.654299 | 1.073922  |
| 48 | 1 | 0 | 4.873429  | -2.839254 | -0.374187 |
| 49 | 1 | 0 | 3.485523  | 2.668868  | -1.765392 |
| 50 | 1 | 0 | 2.743297  | 3.468657  | -0.366682 |
| 51 | 1 | 0 | -1.409176 | -3.510810 | -2.196580 |
| 52 | 1 | 0 | -1.203156 | -3.629876 | -0.445570 |
| 53 | 1 | 0 | -2.493215 | 2.673060  | -0.360104 |
| 54 | 1 | 0 | -3.092632 | 2.080134  | -1.924502 |
| 55 | 1 | 0 | -0.472441 | -0.621569 | 3.531712  |
| 56 | 1 | 0 | -1.566737 | -0.106352 | 2.219255  |
| 57 | 1 | 0 | -0.583996 | 1.833719  | 3.390824  |
| 58 | 1 | 0 | 1.074439  | 1.248810  | 2.993824  |
| 59 | 1 | 0 | 4.049916  | -0.366440 | 1.815648  |
| 60 | 1 | 0 | 2.439601  | -0.572945 | 1.075750  |
| 61 | 1 | 0 | 3.302055  | 1.830665  | 1.366555  |
| 62 | 1 | 0 | 4.454504  | 1.453500  | 0.057211  |
| 63 | 1 | 0 | -3.292266 | -3.422648 | -0.481831 |
| 64 | 1 | 0 | -4.152087 | 1.410458  | 0.254028  |
| 65 | 1 | 0 | -5.393973 | -2.688099 | 0.564421  |

|    |   |   |           |           |          |
|----|---|---|-----------|-----------|----------|
| 66 | 1 | 0 | -5.820025 | -0.267662 | 0.950235 |
| 67 | 3 | 0 | -3.204530 | 3.654708  | 2.568085 |
| 68 | 4 | 0 | 0.187260  | 0.941708  | 0.070597 |

---

### Information about complex Li(BC)Mg

| Center<br>Number | Atomic<br>Number | Atomic<br>Type | Coordinates (Angstroms) |           |           |
|------------------|------------------|----------------|-------------------------|-----------|-----------|
|                  |                  |                | X                       | Y         | Z         |
| 1                | 8                | 0              | 0.077067                | 1.193071  | 1.776435  |
| 2                | 8                | 0              | -1.209762               | -1.180265 | 1.481306  |
| 3                | 8                | 0              | -2.611845               | 1.990371  | -0.221218 |
| 4                | 8                | 0              | -3.359323               | -0.527317 | -0.622686 |
| 5                | 8                | 0              | 2.193633                | 0.989104  | -1.180168 |
| 6                | 8                | 0              | 1.449756                | -1.469878 | -0.658298 |
| 7                | 7                | 0              | 0.219379                | 3.017910  | -0.401839 |
| 8                | 7                | 0              | -1.331221               | -2.414886 | -0.951977 |
| 9                | 6                | 0              | 0.749971                | 3.343997  | 0.923772  |
| 10               | 6                | 0              | -1.019171               | 3.729609  | -0.724405 |
| 11               | 6                | 0              | -1.662041               | -3.201060 | 0.263822  |
| 12               | 6                | 0              | -2.455399               | -2.338676 | -1.909264 |
| 13               | 6                | 0              | 1.181736                | 3.142937  | -1.501806 |
| 14               | 6                | 0              | -0.151649               | -2.964971 | -1.663629 |
| 15               | 6                | 0              | 1.172930                | 2.115673  | 1.726256  |
| 16               | 6                | 0              | -2.091209               | -2.327935 | 1.434085  |
| 17               | 6                | 0              | -2.227432               | 3.326081  | 0.109284  |
| 18               | 6                | 0              | -3.718593               | -1.708624 | -1.335471 |
| 19               | 6                | 0              | 2.483075                | 2.376547  | -1.316318 |

|    |   |   |           |           |           |
|----|---|---|-----------|-----------|-----------|
| 20 | 6 | 0 | 1.158142  | -2.861518 | -0.902703 |
| 21 | 6 | 0 | 0.244486  | 0.187022  | 2.786915  |
| 22 | 6 | 0 | -0.996388 | -0.664965 | 2.808007  |
| 23 | 6 | 0 | -3.851511 | 1.581790  | 0.352016  |
| 24 | 6 | 0 | -4.392732 | 0.438308  | -0.485599 |
| 25 | 6 | 0 | 3.179588  | 0.157053  | -0.715802 |
| 26 | 6 | 0 | 2.771722  | -1.159638 | -0.409039 |
| 27 | 6 | 0 | 4.513168  | 0.527315  | -0.524408 |
| 28 | 6 | 0 | 3.688962  | -2.065012 | 0.121642  |
| 29 | 6 | 0 | 5.434125  | -0.396421 | -0.011225 |
| 30 | 6 | 0 | 5.022320  | -1.683018 | 0.318874  |
| 31 | 1 | 0 | -0.021107 | 3.865850  | 1.498146  |
| 32 | 1 | 0 | 1.606512  | 4.038035  | 0.867618  |
| 33 | 1 | 0 | -1.261845 | 3.515881  | -1.770179 |
| 34 | 1 | 0 | -0.897227 | 4.827417  | -0.630941 |
| 35 | 1 | 0 | -0.779111 | -3.758606 | 0.591352  |
| 36 | 1 | 0 | -2.441654 | -3.951431 | 0.060648  |
| 37 | 1 | 0 | -2.714614 | -3.341649 | -2.290927 |
| 38 | 1 | 0 | -2.115845 | -1.726470 | -2.752070 |
| 39 | 1 | 0 | 1.461993  | 4.202180  | -1.675391 |
| 40 | 1 | 0 | 0.690823  | 2.773258  | -2.409059 |
| 41 | 1 | 0 | -0.050331 | -2.405420 | -2.599478 |
| 42 | 1 | 0 | -0.309951 | -4.027452 | -1.916381 |
| 43 | 1 | 0 | 2.048950  | 1.615643  | 1.300305  |
| 44 | 1 | 0 | 1.427507  | 2.431912  | 2.748410  |
| 45 | 1 | 0 | -3.122223 | -1.968526 | 1.355140  |
| 46 | 1 | 0 | -1.974171 | -2.906063 | 2.360353  |
| 47 | 1 | 0 | -2.038633 | 3.404774  | 1.189332  |

|    |    |   |           |           |           |
|----|----|---|-----------|-----------|-----------|
| 48 | 1  | 0 | -3.053064 | 4.010857  | -0.137039 |
| 49 | 1  | 0 | -4.389861 | -1.460302 | -2.169331 |
| 50 | 1  | 0 | -4.256642 | -2.392741 | -0.662596 |
| 51 | 1  | 0 | 3.116263  | 2.547811  | -2.198520 |
| 52 | 1  | 0 | 3.037356  | 2.734973  | -0.439619 |
| 53 | 1  | 0 | 1.144551  | -3.405776 | 0.050981  |
| 54 | 1  | 0 | 1.950977  | -3.287559 | -1.529153 |
| 55 | 1  | 0 | 0.376909  | 0.655887  | 3.772912  |
| 56 | 1  | 0 | 1.125295  | -0.433664 | 2.571616  |
| 57 | 1  | 0 | -0.837133 | -1.501041 | 3.504905  |
| 58 | 1  | 0 | -1.877569 | -0.086015 | 3.120532  |
| 59 | 1  | 0 | -4.576367 | 2.408140  | 0.342037  |
| 60 | 1  | 0 | -3.701596 | 1.267722  | 1.395662  |
| 61 | 1  | 0 | -5.272245 | 0.002722  | 0.013810  |
| 62 | 1  | 0 | -4.692652 | 0.799491  | -1.479605 |
| 63 | 1  | 0 | 4.847799  | 1.524165  | -0.786601 |
| 64 | 1  | 0 | 3.364872  | -3.058461 | 0.412266  |
| 65 | 1  | 0 | 6.467557  | -0.095158 | 0.130305  |
| 66 | 1  | 0 | 5.722276  | -2.397675 | 0.739494  |
| 67 | 3  | 0 | 0.984359  | -4.455793 | 3.490556  |
| 68 | 12 | 0 | -0.808063 | -0.047012 | -0.353906 |

-----

**Information about complex Li(BC)Ca**

| Center<br>Number | Atomic<br>Number | Atomic<br>Type | Coordinates (Angstroms) |           |          |
|------------------|------------------|----------------|-------------------------|-----------|----------|
|                  |                  |                | X                       | Y         | Z        |
| 1                | 8                | 0              | -0.283604               | 1.530284  | 1.973763 |
| 2                | 8                | 0              | -0.215469               | -1.533221 | 1.403740 |

-----



|    |   |   |           |           |           |
|----|---|---|-----------|-----------|-----------|
| 3  | 8 | 0 | -3.529262 | 1.548073  | -0.384602 |
| 4  | 8 | 0 | -3.109540 | -1.267434 | -0.184348 |
| 5  | 8 | 0 | 1.657927  | 1.447341  | -1.346039 |
| 6  | 8 | 0 | 1.630460  | -1.192899 | -0.663705 |
| 7  | 7 | 0 | -0.783512 | 3.072762  | -0.484598 |
| 8  | 7 | 0 | -0.518060 | -2.593801 | -0.930628 |
| 9  | 6 | 0 | -0.282895 | 3.627492  | 0.771654  |
| 10 | 6 | 0 | -2.157264 | 3.486352  | -0.780853 |
| 11 | 6 | 0 | -0.525009 | -3.566151 | 0.217609  |
| 12 | 6 | 0 | -1.798217 | -2.598710 | -1.713046 |
| 13 | 6 | 0 | 0.074916  | 3.268638  | -1.650404 |
| 14 | 6 | 0 | 0.591075  | -2.920846 | -1.890169 |
| 15 | 6 | 0 | 0.518647  | 2.652161  | 1.636194  |
| 16 | 6 | 0 | -0.873880 | -2.835595 | 1.499112  |
| 17 | 6 | 0 | -3.218161 | 2.842362  | 0.108504  |
| 18 | 6 | 0 | -3.099006 | -2.465664 | -0.929811 |
| 19 | 6 | 0 | 1.537272  | 2.864346  | -1.507557 |
| 20 | 6 | 0 | 1.918929  | -2.496682 | -1.293671 |
| 21 | 6 | 0 | 0.441631  | 0.511930  | 2.640882  |
| 22 | 6 | 0 | -0.341865 | -0.781600 | 2.644089  |
| 23 | 6 | 0 | -4.189326 | 0.728913  | 0.557275  |
| 24 | 6 | 0 | -4.382293 | -0.652809 | -0.032893 |
| 25 | 6 | 0 | 2.775856  | 0.948857  | -0.750899 |
| 26 | 6 | 0 | 2.749745  | -0.400363 | -0.337065 |
| 27 | 6 | 0 | 3.943242  | 1.687301  | -0.504367 |
| 28 | 6 | 0 | 3.829645  | -0.975284 | 0.325268  |
| 29 | 6 | 0 | 5.036901  | 1.102972  | 0.144731  |
| 30 | 6 | 0 | 4.981232  | -0.221633 | 0.570887  |

|    |   |   |           |           |           |
|----|---|---|-----------|-----------|-----------|
| 31 | 1 | 0 | -1.134467 | 3.964767  | 1.370145  |
| 32 | 1 | 0 | 0.341523  | 4.527996  | 0.608657  |
| 33 | 1 | 0 | -2.388937 | 3.206024  | -1.813248 |
| 34 | 1 | 0 | -2.268699 | 4.588549  | -0.718316 |
| 35 | 1 | 0 | 0.479551  | -3.997427 | 0.337032  |
| 36 | 1 | 0 | -1.210601 | -4.400377 | 0.033729  |
| 37 | 1 | 0 | -1.850231 | -3.543732 | -2.275809 |
| 38 | 1 | 0 | -1.730314 | -1.764228 | -2.416445 |
| 39 | 1 | 0 | 0.103018  | 4.337533  | -1.959601 |
| 40 | 1 | 0 | -0.359361 | 2.702112  | -2.480828 |
| 41 | 1 | 0 | 0.398771  | -2.363122 | -2.809634 |
| 42 | 1 | 0 | 0.595567  | -3.994700 | -2.116382 |
| 43 | 1 | 0 | 1.423233  | 2.308887  | 1.122343  |
| 44 | 1 | 0 | 0.839519  | 3.183453  | 2.549541  |
| 45 | 1 | 0 | -1.944454 | -2.658732 | 1.632350  |
| 46 | 1 | 0 | -0.449712 | -3.376420 | 2.356120  |
| 47 | 1 | 0 | -2.865090 | 2.771517  | 1.146546  |
| 48 | 1 | 0 | -4.125586 | 3.470248  | 0.103741  |
| 49 | 1 | 0 | -3.904655 | -2.467734 | -1.679727 |
| 50 | 1 | 0 | -3.271588 | -3.334556 | -0.274272 |
| 51 | 1 | 0 | 2.069196  | 3.174217  | -2.417797 |
| 52 | 1 | 0 | 2.002116  | 3.382263  | -0.662279 |
| 53 | 1 | 0 | 2.285942  | -3.192479 | -0.526778 |
| 54 | 1 | 0 | 2.680978  | -2.349807 | -2.062921 |
| 55 | 1 | 0 | 0.615073  | 0.792932  | 3.693870  |
| 56 | 1 | 0 | 1.425070  | 0.351221  | 2.177485  |
| 57 | 1 | 0 | 0.046093  | -1.435673 | 3.432465  |
| 58 | 1 | 0 | -1.405918 | -0.580850 | 2.812827  |

|    |    |   |           |           |           |
|----|----|---|-----------|-----------|-----------|
| 59 | 1  | 0 | -5.181080 | 1.140389  | 0.815855  |
| 60 | 1  | 0 | -3.597766 | 0.658136  | 1.482995  |
| 61 | 1  | 0 | -5.026909 | -1.246540 | 0.636190  |
| 62 | 1  | 0 | -4.879412 | -0.569843 | -1.010868 |
| 63 | 1  | 0 | 4.011501  | 2.716978  | -0.834298 |
| 64 | 1  | 0 | 3.764039  | -2.004998 | 0.674001  |
| 65 | 1  | 0 | 5.930880  | 1.696481  | 0.312202  |
| 66 | 1  | 0 | 5.817176  | -0.677903 | 1.091020  |
| 67 | 3  | 0 | 2.717470  | -4.998796 | 2.320562  |
| 68 | 20 | 0 | -0.033351 | -1.023199 | -0.206415 |

-----

**Information about complex Na(BC)Be**

| Center | Atomic | Atomic | Coordinates (Angstroms) |           |           |
|--------|--------|--------|-------------------------|-----------|-----------|
| Number | Number | Type   | X                       | Y         | Z         |
| 1      | 8      | 0      | 0.409252                | -1.212387 | 1.947928  |
| 2      | 8      | 0      | 0.459534                | 1.520034  | 1.251632  |
| 3      | 8      | 0      | 3.584780                | -1.176917 | -0.214103 |
| 4      | 8      | 0      | 3.013335                | 1.501719  | -0.719074 |
| 5      | 8      | 0      | -1.353790               | -1.931908 | -1.115665 |
| 6      | 8      | 0      | -1.703995               | 0.687672  | -1.038532 |
| 7      | 7      | 0      | 1.187611                | -3.093207 | -0.092472 |
| 8      | 7      | 0      | 0.472517                | 2.565977  | -1.299322 |
| 9      | 6      | 0      | 0.717629                | -3.493653 | 1.234763  |
| 10     | 6      | 0      | 2.613324                | -3.366934 | -0.296404 |
| 11     | 6      | 0      | 0.382930                | 3.486970  | -0.133265 |
| 12     | 6      | 0      | 1.644365                | 2.843881  | -2.162118 |
| 13     | 6      | 0      | 0.396654                | -3.596104 | -1.215839 |

|    |   |   |           |           |           |
|----|---|---|-----------|-----------|-----------|
| 14 | 6 | 0 | -0.759064 | 2.620912  | -2.126722 |
| 15 | 6 | 0 | -0.220477 | -2.489432 | 1.905637  |
| 16 | 6 | 0 | 0.932971  | 2.882166  | 1.150631  |
| 17 | 6 | 0 | 3.544163  | -2.426575 | 0.461051  |
| 18 | 6 | 0 | 2.981597  | 2.728170  | -1.442150 |
| 19 | 6 | 0 | -1.101083 | -3.336955 | -1.142352 |
| 20 | 6 | 0 | -1.984548 | 2.054011  | -1.430833 |
| 21 | 6 | 0 | -0.340857 | -0.249542 | 2.683738  |
| 22 | 6 | 0 | 0.376840  | 1.073557  | 2.620455  |
| 23 | 6 | 0 | 4.241383  | -0.157025 | 0.510925  |
| 24 | 6 | 0 | 4.327637  | 1.078526  | -0.360529 |
| 25 | 6 | 0 | -2.628626 | -1.505294 | -0.844627 |
| 26 | 6 | 0 | -2.809267 | -0.107390 | -0.761271 |
| 27 | 6 | 0 | -3.723026 | -2.348894 | -0.633559 |
| 28 | 6 | 0 | -4.053951 | 0.415447  | -0.417307 |
| 29 | 6 | 0 | -4.978183 | -1.814857 | -0.314132 |
| 30 | 6 | 0 | -5.140693 | -0.439464 | -0.194287 |
| 31 | 1 | 0 | 1.585719  | -3.611491 | 1.889530  |
| 32 | 1 | 0 | 0.216008  | -4.479500 | 1.218275  |
| 33 | 1 | 0 | 2.836395  | -3.253361 | -1.361714 |
| 34 | 1 | 0 | 2.869103  | -4.409824 | -0.023364 |
| 35 | 1 | 0 | -0.666737 | 3.737973  | 0.055238  |
| 36 | 1 | 0 | 0.891101  | 4.439882  | -0.339334 |
| 37 | 1 | 0 | 1.572737  | 3.852898  | -2.601444 |
| 38 | 1 | 0 | 1.626540  | 2.110938  | -2.975886 |
| 39 | 1 | 0 | 0.503878  | -4.695673 | -1.330778 |
| 40 | 1 | 0 | 0.784887  | -3.127151 | -2.125825 |
| 41 | 1 | 0 | -0.568986 | 2.042409  | -3.036421 |

|    |    |   |           |           |           |
|----|----|---|-----------|-----------|-----------|
| 42 | 1  | 0 | -0.987397 | 3.657532  | -2.422344 |
| 43 | 1  | 0 | -1.181906 | -2.404237 | 1.385783  |
| 44 | 1  | 0 | -0.426671 | -2.838887 | 2.930377  |
| 45 | 1  | 0 | 2.027103  | 2.876805  | 1.198331  |
| 46 | 1  | 0 | 0.530581  | 3.464080  | 1.991303  |
| 47 | 1  | 0 | 3.208488  | -2.282468 | 1.498096  |
| 48 | 1  | 0 | 4.555219  | -2.865447 | 0.491566  |
| 49 | 1  | 0 | 3.779082  | 2.747590  | -2.198506 |
| 50 | 1  | 0 | 3.154429  | 3.570607  | -0.755067 |
| 51 | 1  | 0 | -1.574552 | -3.781862 | -2.028236 |
| 52 | 1  | 0 | -1.539332 | -3.815325 | -0.258073 |
| 53 | 1  | 0 | -2.276332 | 2.635722  | -0.546140 |
| 54 | 1  | 0 | -2.820126 | 2.056865  | -2.139579 |
| 55 | 1  | 0 | -0.429246 | -0.549993 | 3.739711  |
| 56 | 1  | 0 | -1.355947 | -0.147871 | 2.273047  |
| 57 | 1  | 0 | -0.196098 | 1.816092  | 3.192747  |
| 58 | 1  | 0 | 1.391318  | 0.988209  | 3.034231  |
| 59 | 1  | 0 | 5.266999  | -0.458629 | 0.783341  |
| 60 | 1  | 0 | 3.695811  | 0.066165  | 1.441645  |
| 61 | 1  | 0 | 4.844764  | 1.875313  | 0.196501  |
| 62 | 1  | 0 | 4.901228  | 0.857989  | -1.271963 |
| 63 | 1  | 0 | -3.611290 | -3.422385 | -0.725313 |
| 64 | 1  | 0 | -4.183170 | 1.484743  | -0.290477 |
| 65 | 1  | 0 | -5.816728 | -2.485702 | -0.154807 |
| 66 | 1  | 0 | -6.101128 | -0.014922 | 0.078865  |
| 67 | 11 | 0 | -2.948357 | 4.406589  | 2.539758  |
| 68 | 4  | 0 | 0.628513  | 0.341556  | -0.614103 |

---

### Information about complex Na(BC)Mg

| Center<br>Number | Atomic<br>Number | Atomic<br>Type | Coordinates (Angstroms) |           |           |
|------------------|------------------|----------------|-------------------------|-----------|-----------|
|                  |                  |                | X                       | Y         | Z         |
| 1                | 8                | 0              | -0.586438               | 0.685867  | 1.608701  |
| 2                | 8                | 0              | 0.720772                | -1.678784 | 1.158323  |
| 3                | 8                | 0              | -4.289694               | -0.493642 | 0.073642  |
| 4                | 8                | 0              | -1.927759               | -2.120809 | -0.523393 |
| 5                | 8                | 0              | 0.313228                | 2.210525  | -1.203683 |
| 6                | 8                | 0              | 1.737767                | 0.078084  | -1.169682 |
| 7                | 7                | 0              | -2.471415               | 1.992111  | -0.253059 |
| 8                | 7                | 0              | 0.661945                | -2.479371 | -1.431908 |
| 9                | 6                | 0              | -2.174421               | 2.454708  | 1.099641  |
| 10               | 6                | 0              | -3.916099               | 1.865324  | -0.477616 |
| 11               | 6                | 0              | 1.213448                | -3.388301 | -0.410898 |
| 12               | 6                | 0              | -0.470103               | -3.032171 | -2.166107 |
| 13               | 6                | 0              | -1.974682               | 2.869589  | -1.317602 |
| 14               | 6                | 0              | 1.705484                | -1.979108 | -2.329996 |
| 15               | 6                | 0              | -0.808689               | 2.083403  | 1.675025  |
| 16               | 6                | 0              | 0.720806                | -3.084948 | 1.000270  |
| 17               | 6                | 0              | -4.682502               | 0.831024  | 0.336433  |
| 18               | 6                | 0              | -1.649471               | -3.298843 | -1.254595 |
| 19               | 6                | 0              | -0.541011               | 3.333053  | -1.202105 |
| 20               | 6                | 0              | 2.590368                | -0.979630 | -1.620791 |
| 21               | 6                | 0              | 0.488537                | 0.270867  | 2.450671  |
| 22               | 6                | 0              | 0.513314                | -1.232777 | 2.486888  |
| 23               | 6                | 0              | -3.379914               | -1.020240 | 1.015773  |
| 24               | 6                | 0              | -2.881472               | -2.341940 | 0.501060  |

|    |   |   |           |           |           |
|----|---|---|-----------|-----------|-----------|
| 25 | 6 | 0 | 1.596457  | 2.383134  | -0.774201 |
| 26 | 6 | 0 | 2.362464  | 1.206887  | -0.718176 |
| 27 | 6 | 0 | 2.160896  | 3.591067  | -0.378573 |
| 28 | 6 | 0 | 3.658999  | 1.238028  | -0.225399 |
| 29 | 6 | 0 | 3.472467  | 3.620226  | 0.107407  |
| 30 | 6 | 0 | 4.211438  | 2.451068  | 0.194081  |
| 31 | 1 | 0 | -2.916479 | 2.016389  | 1.770247  |
| 32 | 1 | 0 | -2.289751 | 3.551853  | 1.196641  |
| 33 | 1 | 0 | -4.056349 | 1.604397  | -1.531346 |
| 34 | 1 | 0 | -4.421075 | 2.841499  | -0.321149 |
| 35 | 1 | 0 | 2.304453  | -3.289518 | -0.395044 |
| 36 | 1 | 0 | 1.001056  | -4.439631 | -0.655122 |
| 37 | 1 | 0 | -0.214359 | -3.969725 | -2.691471 |
| 38 | 1 | 0 | -0.772423 | -2.300697 | -2.922950 |
| 39 | 1 | 0 | -2.583245 | 3.795128  | -1.371576 |
| 40 | 1 | 0 | -2.103001 | 2.344071  | -2.269526 |
| 41 | 1 | 0 | 1.221020  | -1.482525 | -3.176980 |
| 42 | 1 | 0 | 2.336649  | -2.789085 | -2.729717 |
| 43 | 1 | 0 | 0.025593  | 2.605232  | 1.198470  |
| 44 | 1 | 0 | -0.819849 | 2.397502  | 2.729781  |
| 45 | 1 | 0 | -0.290295 | -3.470787 | 1.192801  |
| 46 | 1 | 0 | 1.408830  | -3.540870 | 1.725516  |
| 47 | 1 | 0 | -4.643157 | 1.036342  | 1.415718  |
| 48 | 1 | 0 | -5.734131 | 0.918409  | 0.040959  |
| 49 | 1 | 0 | -2.524519 | -3.588425 | -1.853237 |
| 50 | 1 | 0 | -1.431732 | -4.126505 | -0.563571 |
| 51 | 1 | 0 | -0.308104 | 3.986513  | -2.053844 |
| 52 | 1 | 0 | -0.404935 | 3.925884  | -0.290437 |

|    |    |   |           |           |           |
|----|----|---|-----------|-----------|-----------|
| 53 | 1  | 0 | 3.123880  | -1.432643 | -0.772332 |
| 54 | 1  | 0 | 3.336764  | -0.575687 | -2.314574 |
| 55 | 1  | 0 | 0.342580  | 0.653983  | 3.469685  |
| 56 | 1  | 0 | 1.442761  | 0.656346  | 2.064313  |
| 57 | 1  | 0 | 1.341458  | -1.570235 | 3.129349  |
| 58 | 1  | 0 | -0.441474 | -1.627321 | 2.868524  |
| 59 | 1  | 0 | -3.885960 | -1.180829 | 1.981531  |
| 60 | 1  | 0 | -2.529376 | -0.347980 | 1.175770  |
| 61 | 1  | 0 | -2.417491 | -2.911596 | 1.321000  |
| 62 | 1  | 0 | -3.727032 | -2.922985 | 0.108669  |
| 63 | 1  | 0 | 1.603200  | 4.516904  | -0.453918 |
| 64 | 1  | 0 | 4.242077  | 0.323669  | -0.149286 |
| 65 | 1  | 0 | 3.902984  | 4.566332  | 0.417821  |
| 66 | 1  | 0 | 5.221692  | 2.463718  | 0.587838  |
| 67 | 12 | 0 | -0.070594 | -0.596627 | 0.009959  |
| 68 | 11 | 0 | 4.375660  | -2.232658 | 2.027117  |

-----

**Information about complex Na(BC)Ca**

| Center | Atomic | Atomic | Coordinates (Angstroms) |   |   |
|--------|--------|--------|-------------------------|---|---|
| Number | Number | Type   | X                       | Y | Z |

|   |   |   |           |           |           |
|---|---|---|-----------|-----------|-----------|
| 1 | 8 | 0 | 0.341934  | -1.245289 | 1.983272  |
| 2 | 8 | 0 | 0.437067  | 1.488323  | 1.296394  |
| 3 | 8 | 0 | 3.528582  | -1.250820 | -0.162620 |
| 4 | 8 | 0 | 3.000282  | 1.437799  | -0.661486 |
| 5 | 8 | 0 | -1.416194 | -1.928006 | -1.091547 |
| 6 | 8 | 0 | -1.727134 | 0.696309  | -1.007403 |
| 7 | 7 | 0 | 1.102122  | -3.130988 | -0.059473 |



|    |   |   |           |           |           |
|----|---|---|-----------|-----------|-----------|
| 8  | 7 | 0 | 0.478830  | 2.542293  | -1.250944 |
| 9  | 6 | 0 | 0.619399  | -3.528615 | 1.264031  |
| 10 | 6 | 0 | 2.524551  | -3.425598 | -0.257144 |
| 11 | 6 | 0 | 0.397255  | 3.460715  | -0.082275 |
| 12 | 6 | 0 | 1.659117  | 2.805247  | -2.106897 |
| 13 | 6 | 0 | 0.309370  | -3.618173 | -1.188485 |
| 14 | 6 | 0 | -0.747558 | 2.618574  | -2.084342 |
| 15 | 6 | 0 | -0.306812 | -2.512509 | 1.933535  |
| 16 | 6 | 0 | 0.931555  | 2.843455  | 1.202341  |
| 17 | 6 | 0 | 3.465642  | -2.501922 | 0.508131  |
| 18 | 6 | 0 | 2.990770  | 2.666950  | -1.380600 |
| 19 | 6 | 0 | -1.184631 | -3.336623 | -1.121668 |
| 20 | 6 | 0 | -1.984995 | 2.068015  | -1.396532 |
| 21 | 6 | 0 | -0.397260 | -0.273612 | 2.718520  |
| 22 | 6 | 0 | 0.340675  | 1.038671  | 2.663281  |
| 23 | 6 | 0 | 4.196839  | -0.243363 | 0.569115  |
| 24 | 6 | 0 | 4.306195  | 0.993586  | -0.297751 |
| 25 | 6 | 0 | -2.685794 | -1.483030 | -0.825500 |
| 26 | 6 | 0 | -2.845697 | -0.082833 | -0.738373 |
| 27 | 6 | 0 | -3.793884 | -2.310652 | -0.622768 |
| 28 | 6 | 0 | -4.084064 | 0.457659  | -0.398927 |
| 29 | 6 | 0 | -5.042430 | -1.758724 | -0.307875 |
| 30 | 6 | 0 | -5.184730 | -0.381427 | -0.184243 |
| 31 | 1 | 0 | 1.482269  | -3.661724 | 1.922760  |
| 32 | 1 | 0 | 0.103018  | -4.506696 | 1.241717  |
| 33 | 1 | 0 | 2.754725  | -3.311929 | -1.320931 |
| 34 | 1 | 0 | 2.763139  | -4.473129 | 0.013685  |
| 35 | 1 | 0 | -0.649440 | 3.726961  | 0.101784  |

|    |   |   |           |           |           |
|----|---|---|-----------|-----------|-----------|
| 36 | 1 | 0 | 0.920819  | 4.406494  | -0.282590 |
| 37 | 1 | 0 | 1.604989  | 3.816666  | -2.543196 |
| 38 | 1 | 0 | 1.634346  | 2.075326  | -2.923194 |
| 39 | 1 | 0 | 0.400537  | -4.718858 | -1.306565 |
| 40 | 1 | 0 | 0.709270  | -3.152176 | -2.094929 |
| 41 | 1 | 0 | -0.561629 | 2.040240  | -2.995006 |
| 42 | 1 | 0 | -0.958683 | 3.659494  | -2.377636 |
| 43 | 1 | 0 | -1.264188 | -2.411068 | 1.409138  |
| 44 | 1 | 0 | -0.523471 | -2.862155 | 2.956048  |
| 45 | 1 | 0 | 2.025225  | 2.821374  | 1.255527  |
| 46 | 1 | 0 | 0.533744  | 3.428639  | 2.042921  |
| 47 | 1 | 0 | 3.126918  | -2.356145 | 1.543951  |
| 48 | 1 | 0 | 4.469777  | -2.956148 | 0.542263  |
| 49 | 1 | 0 | 3.792291  | 2.676770  | -2.132864 |
| 50 | 1 | 0 | 3.172827  | 3.504420  | -0.689838 |
| 51 | 1 | 0 | -1.660265 | -3.771409 | -2.011408 |
| 52 | 1 | 0 | -1.634552 | -3.811195 | -0.241213 |
| 53 | 1 | 0 | -2.272443 | 2.651179  | -0.511375 |
| 54 | 1 | 0 | -2.816822 | 2.085838  | -2.109460 |
| 55 | 1 | 0 | -0.495547 | -0.576145 | 3.773022  |
| 56 | 1 | 0 | -1.408595 | -0.155242 | 2.303068  |
| 57 | 1 | 0 | -0.223869 | 1.787918  | 3.235166  |
| 58 | 1 | 0 | 1.351631  | 0.936621  | 3.081868  |
| 59 | 1 | 0 | 5.216379  | -0.561349 | 0.845677  |
| 60 | 1 | 0 | 3.649982  | -0.014987 | 1.497820  |
| 61 | 1 | 0 | 4.832475  | 1.780626  | 0.264540  |
| 62 | 1 | 0 | 4.881011  | 0.767375  | -1.207021 |
| 63 | 1 | 0 | -3.697929 | -3.385406 | -0.717554 |

|    |    |   |           |           |           |
|----|----|---|-----------|-----------|-----------|
| 64 | 1  | 0 | -4.197742 | 1.528368  | -0.269167 |
| 65 | 1  | 0 | -5.891822 | -2.417315 | -0.155019 |
| 66 | 1  | 0 | -6.140011 | 0.056709  | 0.085493  |
| 67 | 11 | 0 | -2.933286 | 4.421906  | 2.577016  |
| 68 | 20 | 0 | 0.597687  | 0.313534  | -0.572404 |

-----

**Information about complex K(BC)Be**

| Center<br>Number | Atomic<br>Number | Atomic<br>Type | Coordinates (Angstroms) |           |           |
|------------------|------------------|----------------|-------------------------|-----------|-----------|
|                  |                  |                | X                       | Y         | Z         |
| 1                | 8                | 0              | 0.655156                | -0.245270 | -2.439716 |
| 2                | 8                | 0              | -1.910965               | -0.442383 | -0.725429 |
| 3                | 8                | 0              | 2.406578                | -3.285252 | -0.315528 |
| 4                | 8                | 0              | 0.082160                | -3.217410 | 1.292511  |
| 5                | 8                | 0              | 2.303656                | 1.906635  | 0.610719  |
| 6                | 8                | 0              | -0.078481               | 1.725731  | 1.698567  |
| 7                | 7                | 0              | 3.364478                | -0.391070 | -1.061951 |
| 8                | 7                | 0              | -1.522683               | -0.959099 | 2.209979  |
| 9                | 6                | 0              | 3.042057                | 0.124391  | -2.395557 |
| 10               | 6                | 0              | 4.033067                | -1.694390 | -1.111426 |
| 11               | 6                | 0              | -2.746427               | -1.123723 | 1.425020  |
| 12               | 6                | 0              | -1.175382               | -2.118683 | 3.026399  |
| 13               | 6                | 0              | 4.121915                | 0.534324  | -0.218166 |
| 14               | 6                | 0              | -1.487406               | 0.262166  | 3.009306  |
| 15               | 6                | 0              | 1.657278                | 0.756269  | -2.534195 |
| 16               | 6                | 0              | -2.515688               | -1.520828 | -0.032418 |
| 17               | 6                | 0              | 3.110438                | -2.853854 | -1.473988 |
| 18               | 6                | 0              | -0.923794               | -3.417203 | 2.267201  |

|    |   |   |           |           |           |
|----|---|---|-----------|-----------|-----------|
| 19 | 6 | 0 | 3.555940  | 1.939107  | -0.064879 |
| 20 | 6 | 0 | -1.390350 | 1.570428  | 2.234937  |
| 21 | 6 | 0 | -0.655031 | 0.266431  | -2.646403 |
| 22 | 6 | 0 | -1.683126 | -0.709449 | -2.100363 |
| 23 | 6 | 0 | 1.250323  | -4.040465 | -0.621553 |
| 24 | 6 | 0 | 0.516907  | -4.405129 | 0.653500  |
| 25 | 6 | 0 | 1.556904  | 3.050347  | 0.623075  |
| 26 | 6 | 0 | 0.251090  | 2.938336  | 1.174401  |
| 27 | 6 | 0 | 1.990372  | 4.283496  | 0.131196  |
| 28 | 6 | 0 | -0.589804 | 4.054561  | 1.155181  |
| 29 | 6 | 0 | 1.140898  | 5.400451  | 0.138542  |
| 30 | 6 | 0 | -0.148395 | 5.282279  | 0.638871  |
| 31 | 1 | 0 | 3.090917  | -0.697556 | -3.116921 |
| 32 | 1 | 0 | 3.793351  | 0.863679  | -2.733154 |
| 33 | 1 | 0 | 4.454429  | -1.908272 | -0.123919 |
| 34 | 1 | 0 | 4.884172  | -1.683701 | -1.823067 |
| 35 | 1 | 0 | -3.309110 | -0.183863 | 1.421456  |
| 36 | 1 | 0 | -3.414981 | -1.875286 | 1.884833  |
| 37 | 1 | 0 | -1.960802 | -2.341535 | 3.782637  |
| 38 | 1 | 0 | -0.259371 | -1.874719 | 3.573828  |
| 39 | 1 | 0 | 5.155041  | 0.678648  | -0.605588 |
| 40 | 1 | 0 | 4.209094  | 0.085084  | 0.776955  |
| 41 | 1 | 0 | -0.615918 | 0.212568  | 3.669379  |
| 42 | 1 | 0 | -2.379681 | 0.346475  | 3.666426  |
| 43 | 1 | 0 | 1.483708  | 1.517502  | -1.764586 |
| 44 | 1 | 0 | 1.605496  | 1.249430  | -3.521680 |
| 45 | 1 | 0 | -1.869216 | -2.405603 | -0.096396 |
| 46 | 1 | 0 | -3.493181 | -1.767449 | -0.486175 |

|    |    |   |           |           |           |
|----|----|---|-----------|-----------|-----------|
| 47 | 1  | 0 | 2.395339  | -2.548414 | -2.249921 |
| 48 | 1  | 0 | 3.710023  | -3.689898 | -1.871891 |
| 49 | 1  | 0 | -0.611822 | -4.176942 | 3.002941  |
| 50 | 1  | 0 | -1.843789 | -3.792266 | 1.787542  |
| 51 | 1  | 0 | 4.278059  | 2.533672  | 0.513915  |
| 52 | 1  | 0 | 3.444544  | 2.423284  | -1.043321 |
| 53 | 1  | 0 | -2.126133 | 1.625085  | 1.422405  |
| 54 | 1  | 0 | -1.598440 | 2.382619  | 2.945584  |
| 55 | 1  | 0 | -0.825229 | 0.425665  | -3.724737 |
| 56 | 1  | 0 | -0.780670 | 1.230884  | -2.133579 |
| 57 | 1  | 0 | -2.627826 | -0.611059 | -2.662351 |
| 58 | 1  | 0 | -1.309327 | -1.734806 | -2.241590 |
| 59 | 1  | 0 | 1.519592  | -4.972120 | -1.150237 |
| 60 | 1  | 0 | 0.584096  | -3.454222 | -1.271900 |
| 61 | 1  | 0 | -0.344389 | -5.039409 | 0.383661  |
| 62 | 1  | 0 | 1.169627  | -4.986130 | 1.324362  |
| 63 | 1  | 0 | 2.994697  | 4.389430  | -0.260287 |
| 64 | 1  | 0 | -1.599101 | 3.980399  | 1.539957  |
| 65 | 1  | 0 | 1.500500  | 6.347694  | -0.251536 |
| 66 | 1  | 0 | -0.822405 | 6.133556  | 0.639664  |
| 67 | 19 | 0 | -7.754569 | 0.426844  | -2.023319 |
| 68 | 4  | 0 | 2.706852  | -2.087714 | 2.640768  |

-----

**Information about complex K(BC)Mg**

| Center<br>Number | Atomic<br>Number | Atomic<br>Type | Coordinates (Angstroms) |          |          |
|------------------|------------------|----------------|-------------------------|----------|----------|
|                  |                  |                | X                       | Y        | Z        |
| 1                | 8                | 0              | -1.075412               | 0.593061 | 2.064702 |

-----

|    |   |   |           |           |           |
|----|---|---|-----------|-----------|-----------|
| 2  | 8 | 0 | 0.563706  | -1.474493 | 1.019827  |
| 3  | 8 | 0 | -3.624596 | -1.327705 | 0.092454  |
| 4  | 8 | 0 | -1.557442 | -2.957952 | -0.789725 |
| 5  | 8 | 0 | -0.547101 | 2.523881  | -1.016855 |
| 6  | 8 | 0 | 1.413114  | 0.768698  | -1.299493 |
| 7  | 7 | 0 | -3.074715 | 1.679651  | 0.299661  |
| 8  | 7 | 0 | 0.955165  | -2.082234 | -1.644023 |
| 9  | 6 | 0 | -2.811029 | 2.205211  | 1.640865  |
| 10 | 6 | 0 | -4.345965 | 0.956500  | 0.211722  |
| 11 | 6 | 0 | 1.769101  | -2.773735 | -0.606777 |
| 12 | 6 | 0 | 0.162568  | -3.023699 | -2.467664 |
| 13 | 6 | 0 | -2.949134 | 2.652791  | -0.785695 |
| 14 | 6 | 0 | 1.803229  | -1.256839 | -2.541576 |
| 15 | 6 | 0 | -1.380931 | 1.983016  | 2.130850  |
| 16 | 6 | 0 | 1.108299  | -2.788476 | 0.764675  |
| 17 | 6 | 0 | -4.338869 | -0.401966 | 0.903216  |
| 18 | 6 | 0 | -0.842593 | -3.835999 | -1.662125 |
| 19 | 6 | 0 | -1.637948 | 3.423949  | -0.829197 |
| 20 | 6 | 0 | 2.449838  | -0.062525 | -1.860539 |
| 21 | 6 | 0 | 0.192978  | 0.281082  | 2.632340  |
| 22 | 6 | 0 | 0.468498  | -1.186012 | 2.430038  |
| 23 | 6 | 0 | -3.403686 | -2.579710 | 0.710891  |
| 24 | 6 | 0 | -2.784524 | -3.513290 | -0.307703 |
| 25 | 6 | 0 | 0.725596  | 3.012112  | -0.869917 |
| 26 | 6 | 0 | 1.772297  | 2.069163  | -0.984376 |
| 27 | 6 | 0 | 1.037937  | 4.348796  | -0.605609 |
| 28 | 6 | 0 | 3.092308  | 2.469614  | -0.784727 |
| 29 | 6 | 0 | 2.369644  | 4.746728  | -0.428409 |

|    |   |   |           |           |           |
|----|---|---|-----------|-----------|-----------|
| 30 | 6 | 0 | 3.392471  | 3.809061  | -0.506334 |
| 31 | 1 | 0 | -3.478961 | 1.708228  | 2.350623  |
| 32 | 1 | 0 | -3.041678 | 3.283868  | 1.715457  |
| 33 | 1 | 0 | -4.568925 | 0.780783  | -0.845193 |
| 34 | 1 | 0 | -5.183406 | 1.553648  | 0.623688  |
| 35 | 1 | 0 | 2.728823  | -2.259027 | -0.498042 |
| 36 | 1 | 0 | 2.011306  | -3.802676 | -0.909801 |
| 37 | 1 | 0 | 0.822263  | -3.722723 | -3.007938 |
| 38 | 1 | 0 | -0.383006 | -2.425460 | -3.205193 |
| 39 | 1 | 0 | -3.748909 | 3.421951  | -0.738220 |
| 40 | 1 | 0 | -3.065351 | 2.111780  | -1.730412 |
| 41 | 1 | 0 | 1.161662  | -0.891957 | -3.349857 |
| 42 | 1 | 0 | 2.605038  | -1.866371 | -2.988358 |
| 43 | 1 | 0 | -0.647378 | 2.544525  | 1.540564  |
| 44 | 1 | 0 | -1.309692 | 2.332375  | 3.173716  |
| 45 | 1 | 0 | 0.304896  | -3.527208 | 0.856396  |
| 46 | 1 | 0 | 1.885162  | -3.009025 | 1.510404  |
| 47 | 1 | 0 | -3.876829 | -0.343122 | 1.898834  |
| 48 | 1 | 0 | -5.377483 | -0.748292 | 1.030580  |
| 49 | 1 | 0 | -1.536171 | -4.320688 | -2.362830 |
| 50 | 1 | 0 | -0.356674 | -4.625636 | -1.070793 |
| 51 | 1 | 0 | -1.681358 | 4.136538  | -1.664485 |
| 52 | 1 | 0 | -1.494675 | 4.003006  | 0.091240  |
| 53 | 1 | 0 | 3.158058  | -0.357541 | -1.075157 |
| 54 | 1 | 0 | 3.000476  | 0.506947  | -2.618745 |
| 55 | 1 | 0 | 0.198196  | 0.493389  | 3.713293  |
| 56 | 1 | 0 | 0.988027  | 0.879308  | 2.163660  |
| 57 | 1 | 0 | 1.428387  | -1.433994 | 2.902755  |

|    |    |   |           |           |           |
|----|----|---|-----------|-----------|-----------|
| 58 | 1  | 0 | -0.326374 | -1.800875 | 2.875015  |
| 59 | 1  | 0 | -4.351128 | -3.027331 | 1.054723  |
| 60 | 1  | 0 | -2.745897 | -2.467097 | 1.587295  |
| 61 | 1  | 0 | -2.594550 | -4.489058 | 0.163990  |
| 62 | 1  | 0 | -3.470877 | -3.656017 | -1.153537 |
| 63 | 1  | 0 | 0.252206  | 5.091999  | -0.546956 |
| 64 | 1  | 0 | 3.895743  | 1.742166  | -0.818209 |
| 65 | 1  | 0 | 2.590852  | 5.789829  | -0.224581 |
| 66 | 1  | 0 | 4.426072  | 4.099203  | -0.348345 |
| 67 | 19 | 0 | 5.658746  | -1.753894 | 2.090775  |
| 68 | 12 | 0 | -0.614652 | -0.648496 | -0.673396 |

-----

**Information about complex K(BC)Ca**

| Center<br>Number | Atomic<br>Number | Atomic<br>Type | Coordinates (Angstroms) |           |           |
|------------------|------------------|----------------|-------------------------|-----------|-----------|
|                  |                  |                | X                       | Y         | Z         |
| 1                | 8                | 0              | -0.747809               | 0.593819  | 1.633304  |
| 2                | 8                | 0              | 0.950111                | -1.470791 | 1.035252  |
| 3                | 8                | 0              | -4.250243               | -1.232730 | 0.270062  |
| 4                | 8                | 0              | -1.665640               | -2.370690 | -0.509512 |
| 5                | 8                | 0              | -0.322895               | 2.319725  | -1.174575 |
| 6                | 8                | 0              | 1.475912                | 0.495137  | -1.288352 |
| 7                | 7                | 0              | -2.954049               | 1.558469  | -0.077696 |
| 8                | 7                | 0              | 0.885245                | -2.213627 | -1.571985 |
| 9                | 6                | 0              | -2.667486               | 2.040478  | 1.270469  |
| 10               | 6                | 0              | -4.360199               | 1.165329  | -0.225322 |
| 11               | 6                | 0              | 1.658548                | -3.022953 | -0.612942 |



|    |   |   |           |           |           |
|----|---|---|-----------|-----------|-----------|
| 12 | 6 | 0 | -0.165440 | -2.955156 | -2.259270 |
| 13 | 6 | 0 | -2.696457 | 2.536185  | -1.139618 |
| 14 | 6 | 0 | 1.759807  | -1.506241 | -2.510358 |
| 15 | 6 | 0 | -1.223935 | 1.922350  | 1.756643  |
| 16 | 6 | 0 | 1.204430  | -2.847920 | 0.832484  |
| 17 | 6 | 0 | -4.867957 | -0.012125 | 0.596634  |
| 18 | 6 | 0 | -1.216184 | -3.459207 | -1.292447 |
| 19 | 6 | 0 | -1.370916 | 3.260043  | -1.089430 |
| 20 | 6 | 0 | 2.482839  | -0.372451 | -1.819930 |
| 21 | 6 | 0 | 0.435102  | 0.372194  | 2.400320  |
| 22 | 6 | 0 | 0.743781  | -1.100019 | 2.386919  |
| 23 | 6 | 0 | -3.202249 | -1.597270 | 1.142665  |
| 24 | 6 | 0 | -2.496845 | -2.789699 | 0.558898  |
| 25 | 6 | 0 | 0.928830  | 2.723005  | -0.811981 |
| 26 | 6 | 0 | 1.903936  | 1.712049  | -0.836444 |
| 27 | 6 | 0 | 1.279534  | 4.007368  | -0.409942 |
| 28 | 6 | 0 | 3.199102  | 1.977641  | -0.415958 |
| 29 | 6 | 0 | 2.589399  | 4.274003  | 0.002858  |
| 30 | 6 | 0 | 3.538532  | 3.264247  | 0.010715  |
| 31 | 1 | 0 | -3.271942 | 1.455715  | 1.967011  |
| 32 | 1 | 0 | -2.980553 | 3.093701  | 1.408839  |
| 33 | 1 | 0 | -4.512774 | 0.904700  | -1.277412 |
| 34 | 1 | 0 | -5.028940 | 2.024818  | -0.009763 |
| 35 | 1 | 0 | 2.710540  | -2.719860 | -0.654769 |
| 36 | 1 | 0 | 1.632788  | -4.090131 | -0.878496 |
| 37 | 1 | 0 | 0.229295  | -3.816167 | -2.827833 |
| 38 | 1 | 0 | -0.645098 | -2.278420 | -2.974267 |
| 39 | 1 | 0 | -3.470037 | 3.330769  | -1.129914 |

|    |    |   |           |           |           |
|----|----|---|-----------|-----------|-----------|
| 40 | 1  | 0 | -2.781491 | 2.015930  | -2.099254 |
| 41 | 1  | 0 | 1.140189  | -1.092679 | -3.312681 |
| 42 | 1  | 0 | 2.506282  | -2.173600 | -2.970379 |
| 43 | 1  | 0 | -0.532944 | 2.602482  | 1.251284  |
| 44 | 1  | 0 | -1.229712 | 2.206505  | 2.819899  |
| 45 | 1  | 0 | 0.297310  | -3.422062 | 1.068618  |
| 46 | 1  | 0 | 2.008579  | -3.180497 | 1.503276  |
| 47 | 1  | 0 | -4.802316 | 0.174282  | 1.678070  |
| 48 | 1  | 0 | -5.933281 | -0.119149 | 0.363188  |
| 49 | 1  | 0 | -2.056078 | -3.896540 | -1.850350 |
| 50 | 1  | 0 | -0.805395 | -4.245000 | -0.641500 |
| 51 | 1  | 0 | -1.316990 | 3.963459  | -1.931458 |
| 52 | 1  | 0 | -1.293356 | 3.848690  | -0.168243 |
| 53 | 1  | 0 | 3.142455  | -0.733989 | -1.017476 |
| 54 | 1  | 0 | 3.096591  | 0.179871  | -2.540945 |
| 55 | 1  | 0 | 0.282052  | 0.699344  | 3.437633  |
| 56 | 1  | 0 | 1.274750  | 0.939278  | 1.973920  |
| 57 | 1  | 0 | 1.658032  | -1.288051 | 2.971080  |
| 58 | 1  | 0 | -0.095005 | -1.676011 | 2.808348  |
| 59 | 1  | 0 | -3.609513 | -1.870903 | 2.129488  |
| 60 | 1  | 0 | -2.484861 | -0.779710 | 1.276455  |
| 61 | 1  | 0 | -1.885237 | -3.278307 | 1.333034  |
| 62 | 1  | 0 | -3.240596 | -3.511902 | 0.195840  |
| 63 | 1  | 0 | 0.554466  | 4.812318  | -0.424390 |
| 64 | 1  | 0 | 3.946945  | 1.188746  | -0.401792 |
| 65 | 1  | 0 | 2.852769  | 5.277770  | 0.318938  |
| 66 | 1  | 0 | 4.550494  | 3.459588  | 0.347750  |
| 67 | 19 | 0 | 4.689932  | -1.341122 | 1.680783  |

68 20 0 -0.139351 -0.608221 -0.353403

-----

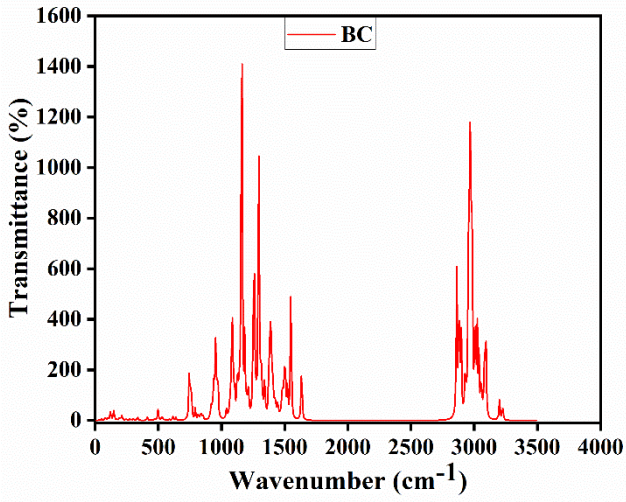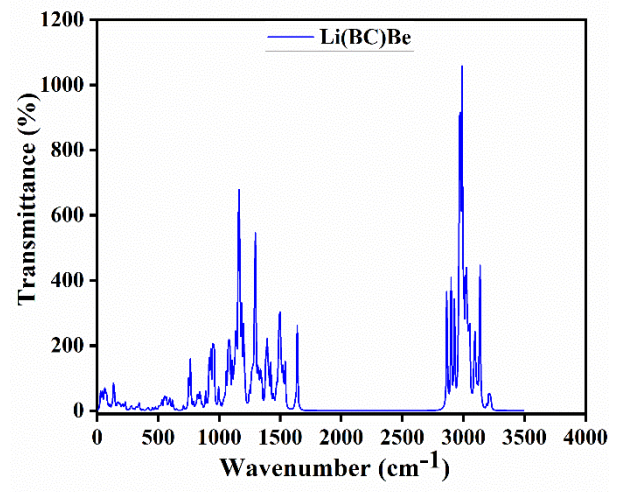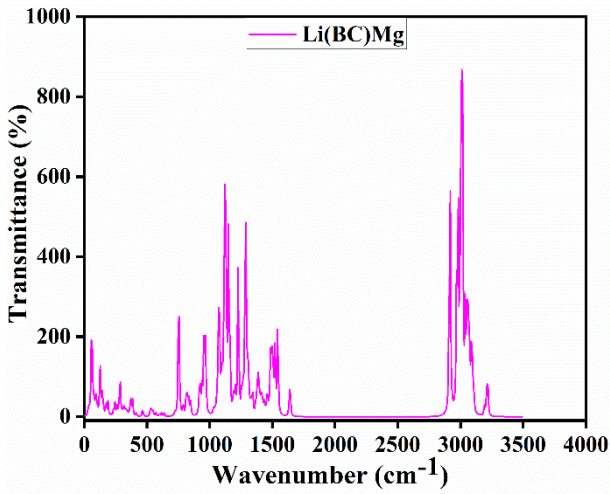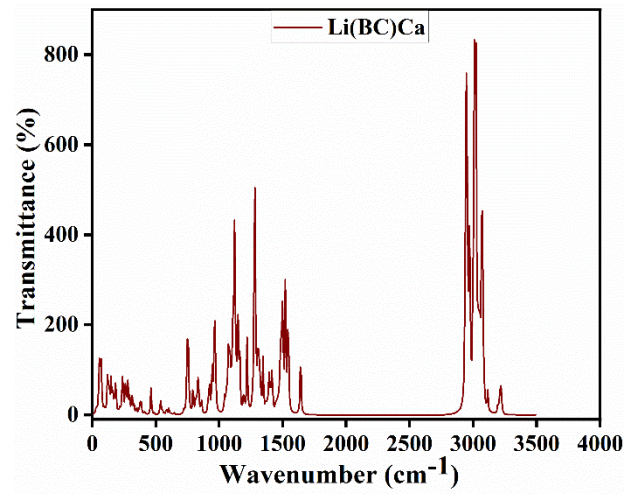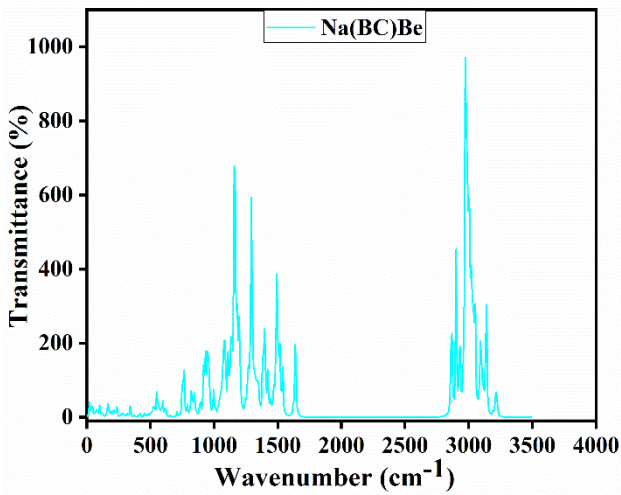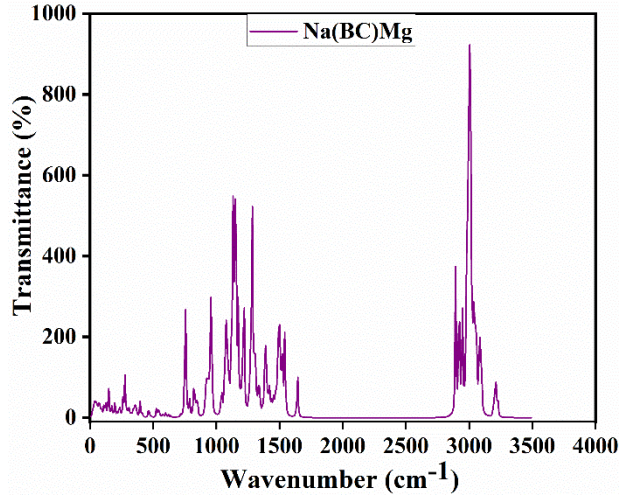

IR Spectra

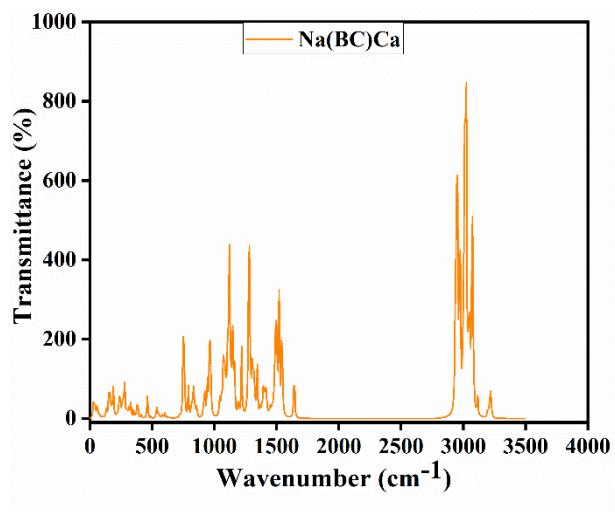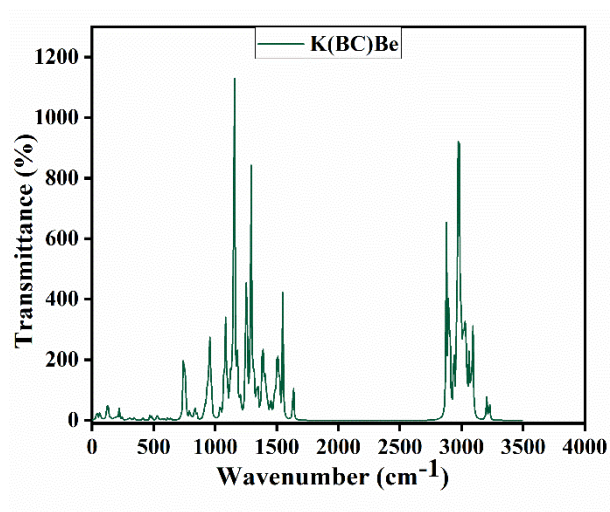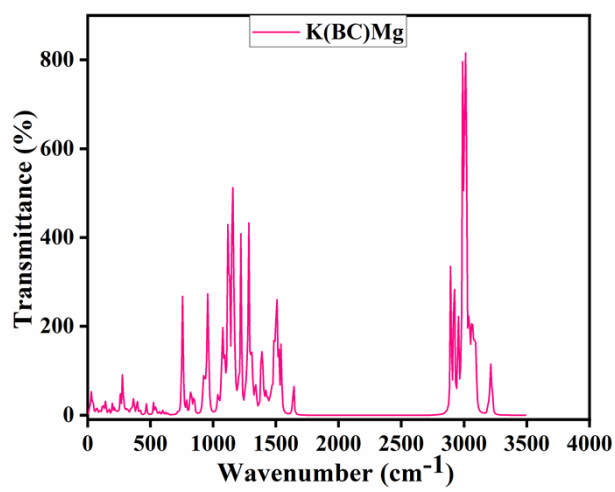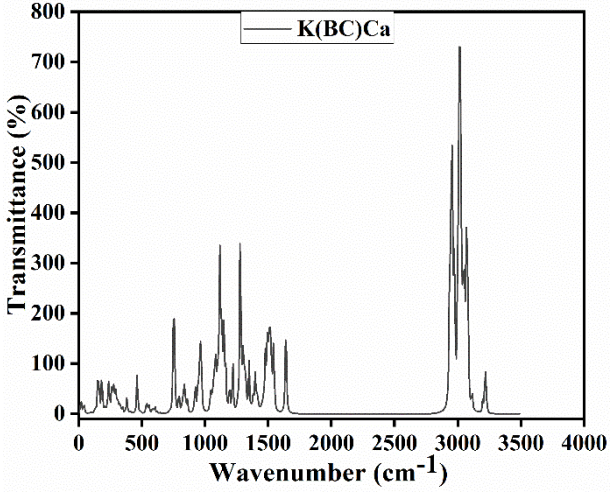

**Fig. 1.** IR spectra of surface BC and all the doped complexes.
